# Supplementary material for: Modifying the 316L stainless steel surface by an electrodeposition technique: towards high-performance electrodes for alkaline water electrolysis
Source: Royal Society of Chemistry journal article supplement (doi:10.1039/d1se01997j), 2022-01-01
Supplement: d1se01997j1.pdf [file d1se01997j1.pdf]

### Supporting Information

#### **Modifying the 316L Stainless Steel Surface by Electrodeposition Technique: Towards High-Performance Electrodes for Alkaline Water Electrolysis**

Ahmed Zaki Alhakemy <sup>a,b,c</sup>, Abu Bakr Ahmed Amine Nassr <sup>d</sup>, Abd El-Hady Kashyout <sup>d</sup>, Zhenhai  
Wen <sup>a,b\*</sup>

<sup>a</sup> *CAS Key Laboratory of Design and Assembly of Functional Nanostructures, and Fujian Key  
Laboratory of Nanomaterials, Fujian Institute of Research on the Structure of Matter, Chinese  
Academy of Sciences, Fuzhou, Fujian 350002, China*

<sup>b</sup> *University of Chinese Academy of Sciences, Beijing 100049, China.*

<sup>c</sup> *Chemistry Department, Faculty of Science, Al-Azhar University, Assiut 71542, Egypt.*

<sup>d</sup> *Electronic Materials Research Department, Advanced Technology and New Materials  
Research Institute (ATNMRI), City of Scientific Research and Technological Applications  
(SRTA-City), New Borg Al-Arab City, Alexandria 21934, Egypt*

**\*Corresponding author**

E-mail: [wen@fjirsm.ac.cn](mailto:wen@fjirsm.ac.cn) (Zhenhai Wen)

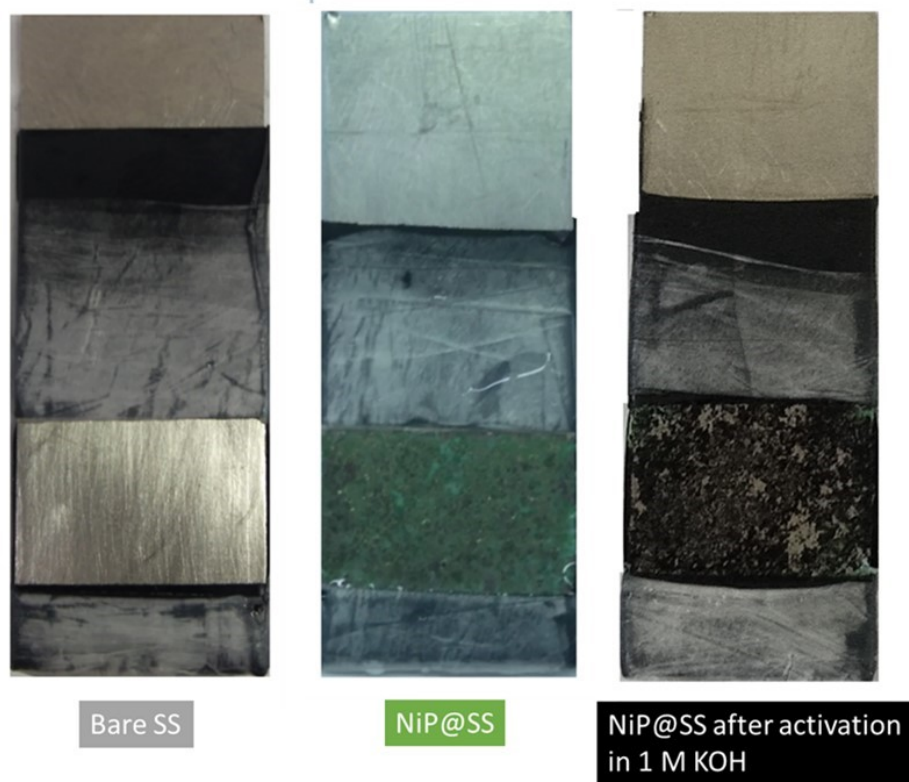

**Fig. S1.** Photos of SS: left before NiP electrodeposition, middle after  $x$ NiP electrodeposition, and right after activation of  $x$ NiP in 1.0M KOH.

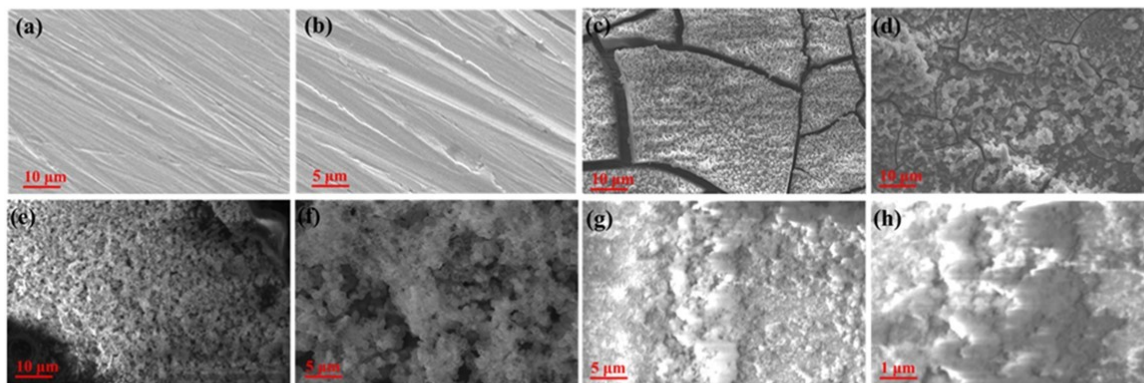

**Fig. S2.** SEM images of bare SS (a and b);  $x\text{NiP}@SS$  electrodes at different deposition times c) 5 min, d) 10 min, and e-f) 15 min; g-h) SEM images of  $\text{Ni}@SS$  electrode at 15 min.

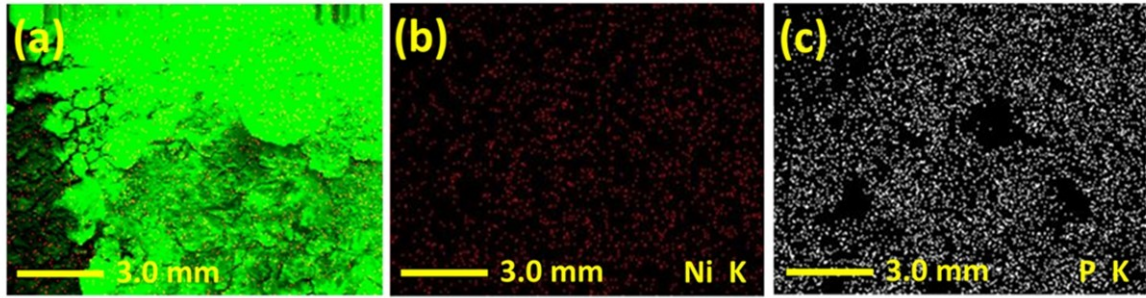

**Fig. S3.** SEM-EDX elemental mapping of 15NiP@SS electrode.

**Table S1:** Elemental analysis of  $x\text{NiP}@SS$  nanoparticles determined by EDX analysis

| <b>Catalyst</b>                                 | <b>Averaged atomic % (EDS)</b> |        |
|-------------------------------------------------|--------------------------------|--------|
|                                                 | Ni                             | P      |
| <b>@ Shortest deposition time<br/>(5NiP@SS)</b> | 51.94                          | 48.06  |
| <b>@ Longest deposition time<br/>(20NiP@SS)</b> | 52.745                         | 47.255 |

**Video S1.** The deposition process of  $x\text{NiP}$  on SS surface at  $-20 \text{ mA cm}^{-2}$ .

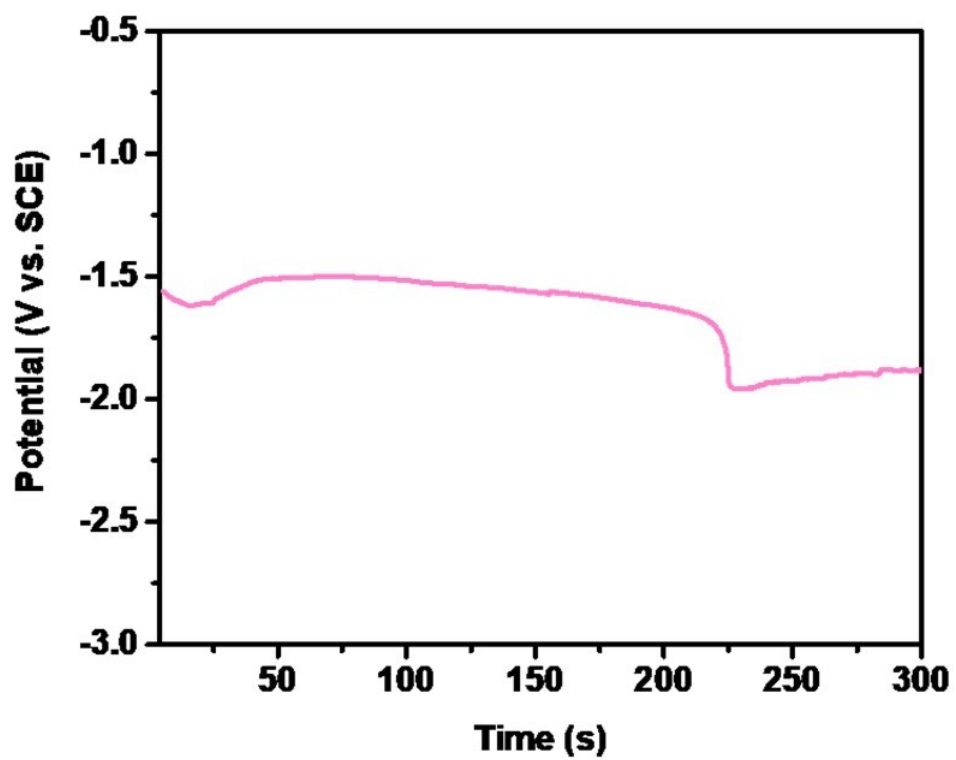

**Fig. S4.** The time-potential curve for the deposition process.

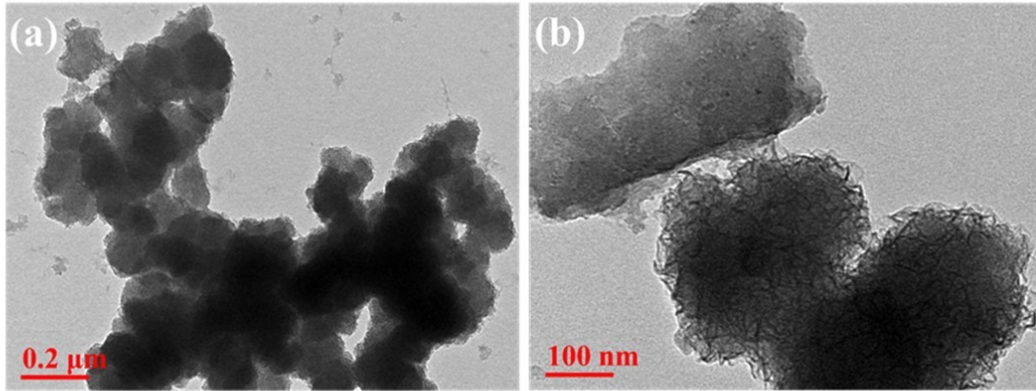

**Fig. S5.** (a) Low-magnification and (b) high-magnification TEM images of 15NiP@SS.

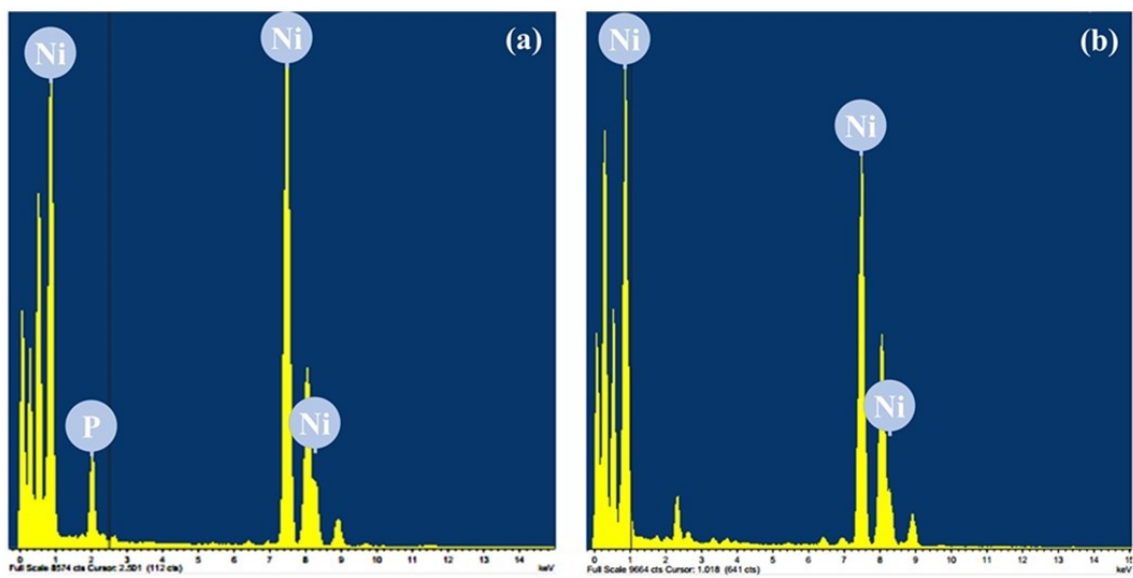

**Fig.S6.** The TEM-EDX images of 15NiP@SS (a) and Ni@SS (b).



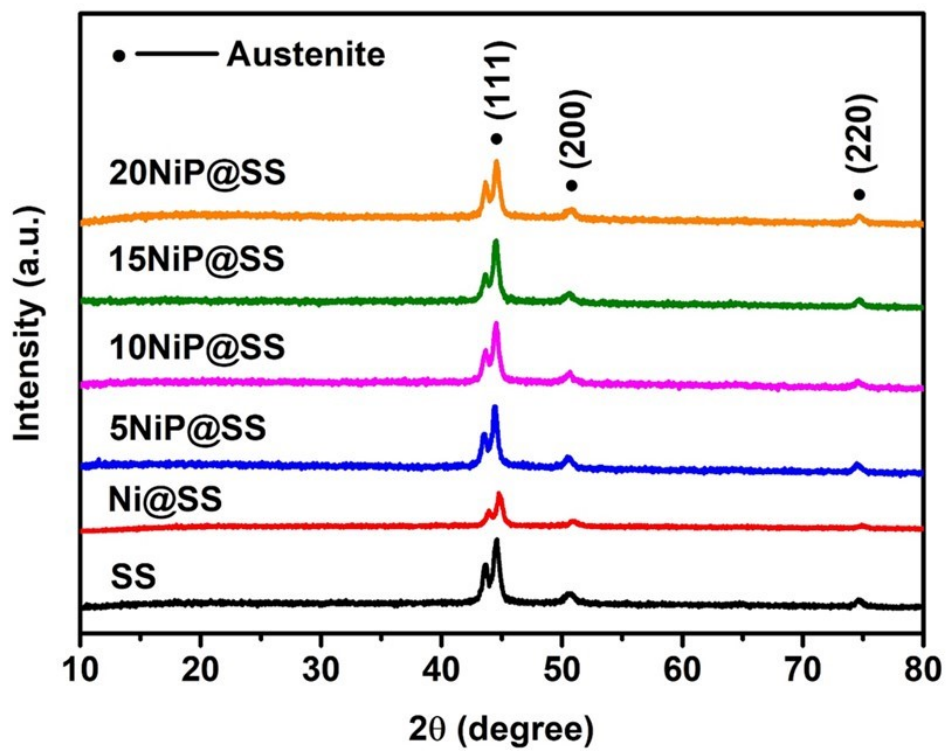

**Fig. S7.** XRD pattern of bare SS, Ni@SS, 5NiP@SS, 10NiP@SS, 15NiP@SS, and 20NiP@SS samples.

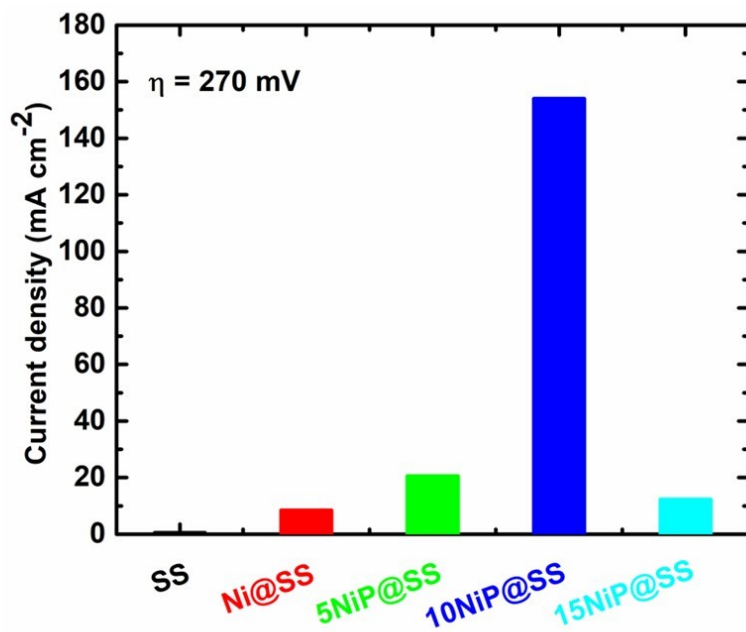

**Fig. S8.** Current densities of OER for all prepared catalysts at an overpotential of 270 mV

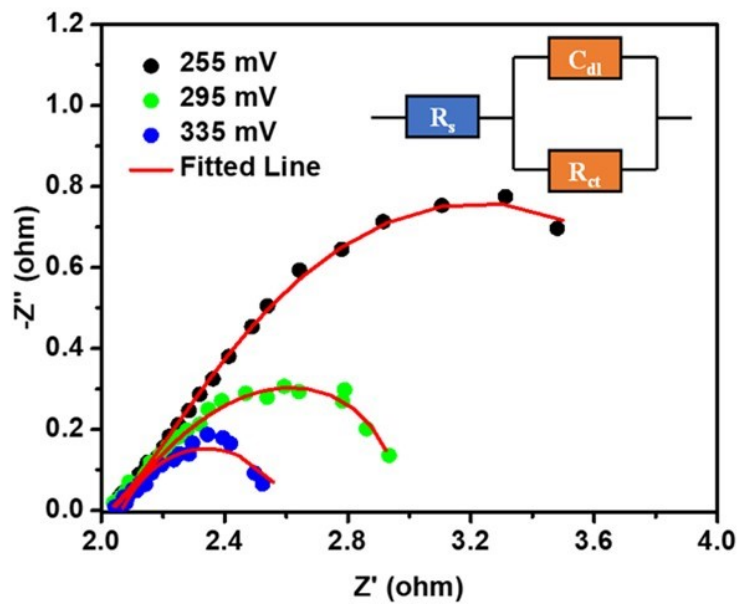

**Fig. S9.** Nyquist plots of 10NiP@SS recorded at increasing the overpotentials of OER over frequency range of 100 kHz to 100 mHz in 1 M KOH.

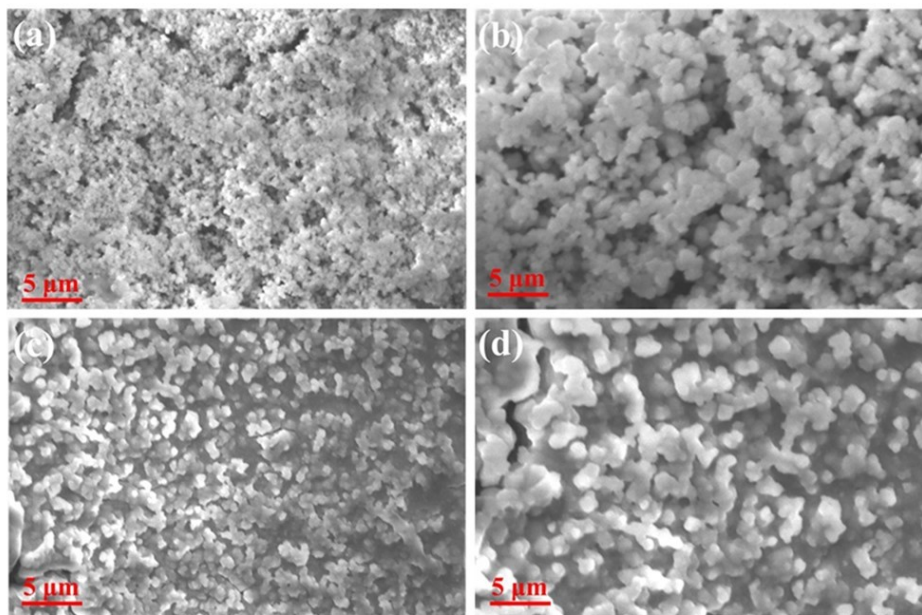

**Fig. S10.** SEM images of 10NiP@SS (a and b) after activation in 1 M KOH solution and (c and d) after OER stability for 24h

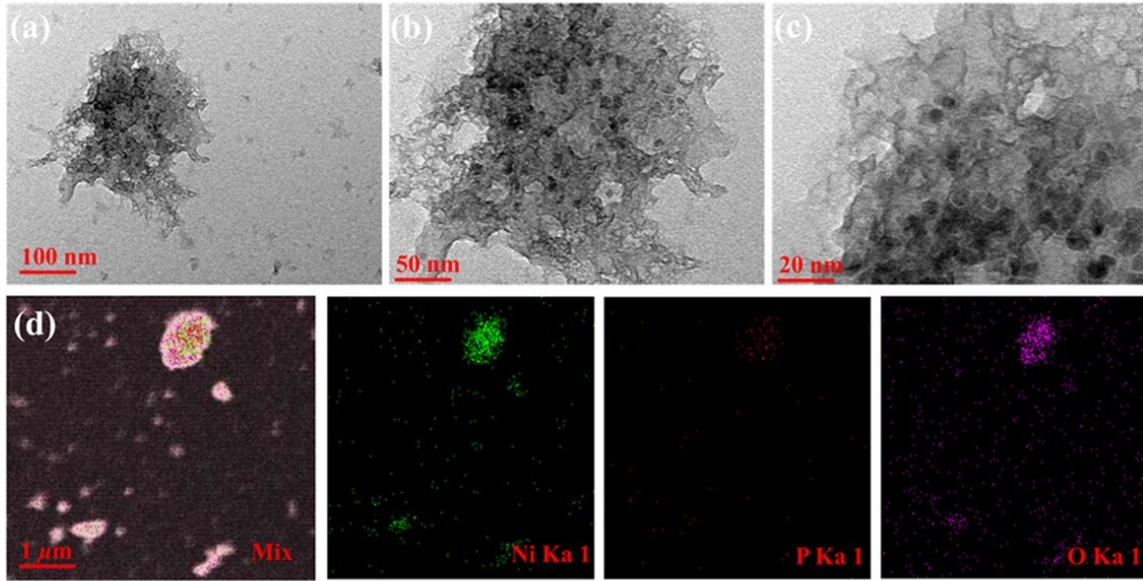

**Fig. S 11.** TEM images (a-c) and elemental mapping (d) of 10NiP@SS after KOH activation.

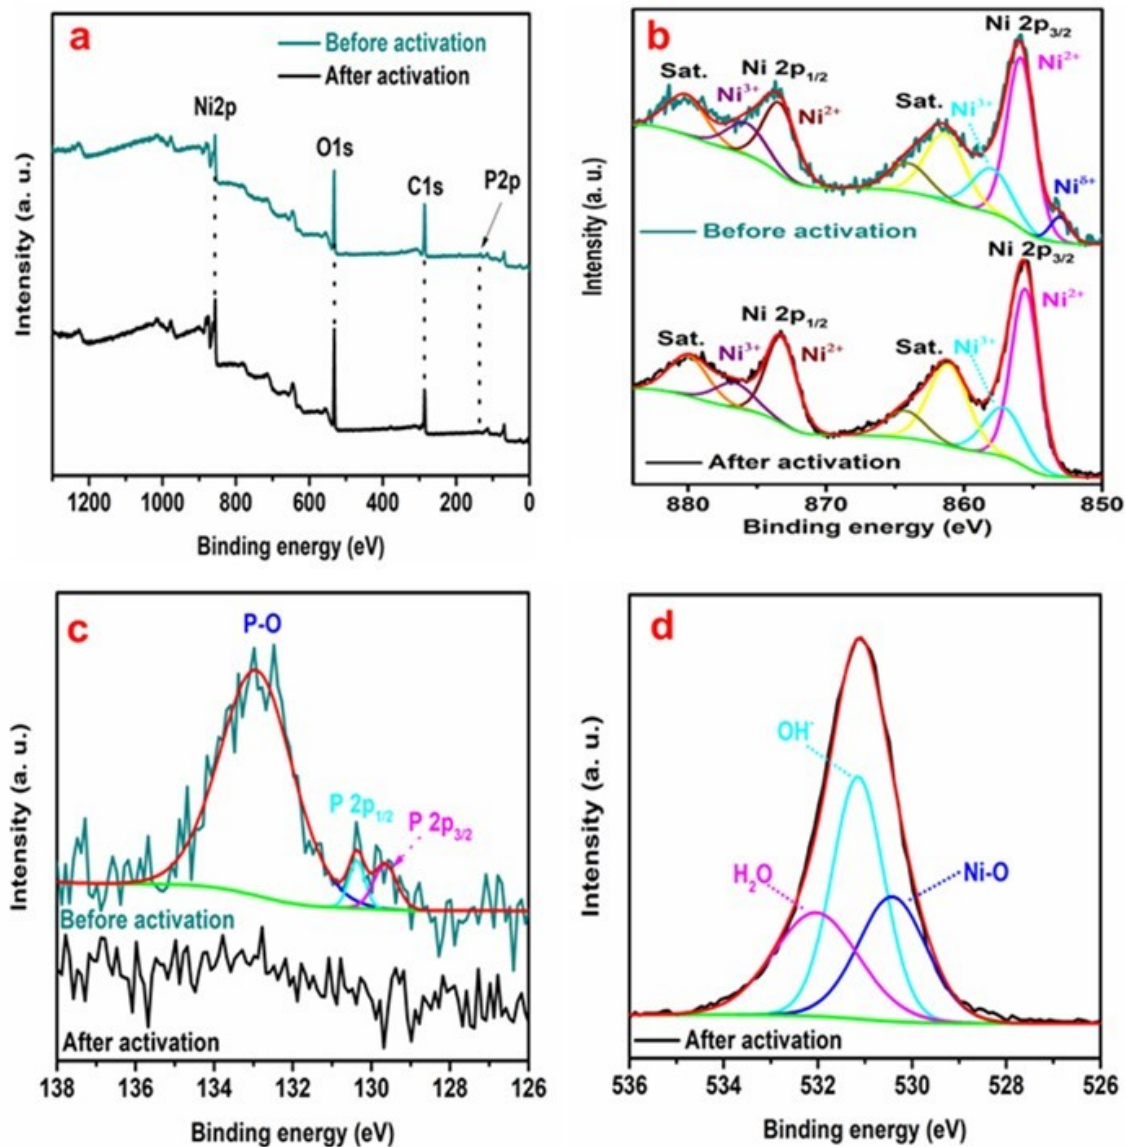

**Fig. S12.** XPS analysis of 10NiP@SS before and after activation: (a) XPS survey spectrum, (b) Ni 2p region, and (c) P 2p region.

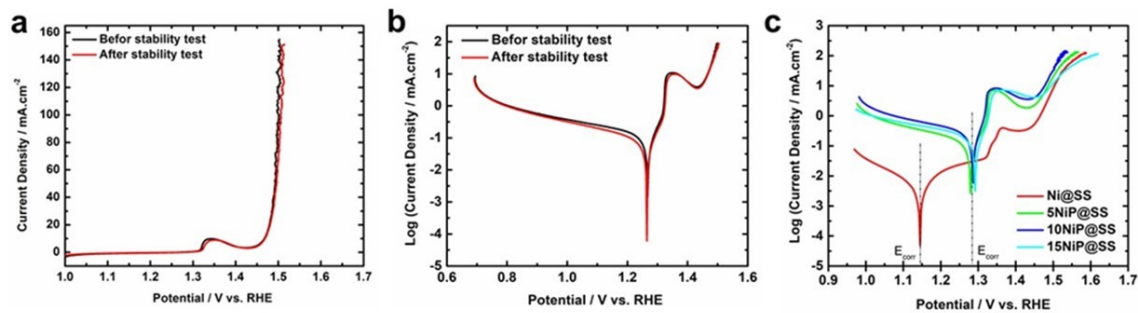

**Fig. S13.** a) LSV curves and b) Corrosion behavior for 10NiP@SS in 1M KOH solution before and after Chronopotentiometry stability test for 24h. c) Corrosion behavior for the as-prepared  $x$ NiP@SS electrodes and Ni@SS in 1M KOH.

**Table S2.** Comparison of the 10NiP@SS catalyst with recently published Ni phosphide- and SS-based catalysts for the OER in alkaline electrolytes.

| Catalysts                                                         | Method of modification                                                                                                                                       | Electrolyte | Overpotential (mv) at specific current density | Tafel plot (mV dec <sup>-1</sup> ) | Ref.      |
|-------------------------------------------------------------------|--------------------------------------------------------------------------------------------------------------------------------------------------------------|-------------|------------------------------------------------|------------------------------------|-----------|
| 10NiP@SS                                                          | Electrodeposition at room temperature                                                                                                                        | 1 M KOH     | 238@10<br>271@100                              | 41.42                              | This work |
| Ni@SS                                                             | Electrodeposition at room temperature                                                                                                                        | 1 M KOH     | 274@10<br>338@100                              | 42.82                              |           |
| Bare SS                                                           | -                                                                                                                                                            | 1 M KOH     | 321@10<br>427@100                              | 71.02                              |           |
| N, O-codoped nickel phosphide (NO/NiP@CP)                         | Hydrothermal process followed by pyrolysis under air and N <sub>2</sub> atmospheres                                                                          | 1 M KOH     | 364@10                                         | 108.9                              | 1         |
| Hierarchical Ni-Co-P hollow nanobricks (HNBs)                     | Template-engaged strategy followed by sequential etching and phosphorization treatments                                                                      | 1 M KOH     | 270@10                                         | 76                                 | 2         |
| Ni <sub>2</sub> P/NF                                              | Two-step hydrothermal-phosphorization process                                                                                                                | 1 M KOH     | 290@50<br>320@100                              | 110                                | 3         |
| Fe, Mo- codoped Ni <sub>3</sub> P                                 | Electrodeposition                                                                                                                                            | 1 M KOH     | 250@0<br>290@100                               | -                                  | 4         |
| Co <sub>3</sub> O <sub>4</sub> @Ni <sub>2</sub> P-CoP/NF          | Phosphating and carbonating Co <sub>3</sub> O <sub>4</sub> nanowires template-directed fabrication Ni-substituted ZIF-67 arrays onto a 3D Ni foam substrate. | 1 M KOH     | 298@50                                         | 75                                 | 5         |
| Mo-Ni <sub>3</sub> S <sub>2</sub> /Ni <sub>x</sub> P <sub>y</sub> | Solvothermal followed by phosphorization                                                                                                                     | 1 M KOH     | 238@50                                         | 60.6                               | 6         |
| Mo-NiCoP                                                          | Hydrothermal followed by phosphorization                                                                                                                     | 1 M KOH     | 269@10<br>364@100                              | 76.7                               | 7         |
| Highly porous Ni-P                                                | Electrodeposition                                                                                                                                            | 1 M KOH     | 279@10                                         | 39.5                               | 8         |
| OESSC                                                             | Acid etching followed by oxidizing by heating                                                                                                                | 1 M KOH     | 290@10                                         | 38.0                               | 9         |



|                                                    |                                                                                                                                                 |         |                   |      |    |
|----------------------------------------------------|-------------------------------------------------------------------------------------------------------------------------------------------------|---------|-------------------|------|----|
|                                                    | and CH <sub>4</sub> plasma treatment, respectively.                                                                                             |         |                   |      |    |
| Sulfurized stainless steel foil (SSFS)             | Annealing process in presence of sulfur at 500 °C under Ar atmosphere.                                                                          | 1 M KOH | 262@10            | 42.0 | 10 |
| 316 L SS ex situ-activated                         | Anodic dissolution of the 316 L metals followed by their possible precipitation in the 5 M LiOH electrolyte.                                    | 1 M KOH | 300@10<br>330@100 | 42   | 11 |
| N-doped surface-etched stainless-steel mesh (NESS) | Exfoliation method followed by annealing process at 400 °C                                                                                      | 1 M KOH | 278@10            | 83.0 | 12 |
| Elox_SS                                            | Thermal sulfurization in H <sub>2</sub> S/Ar atmosphere at 500 °C followed by electrooxidation process in KOH                                   | 1 M KOH | 267@10            | 77.1 | 13 |
| Se-SS                                              | Thermo-selenization followed by acid etching process.                                                                                           | 1 M KOH | 264@100           | 36   | 14 |
| SSM-Ni-P (SSM= stainless steel mesh)               | Chemical bath deposition of Ni followed by phosphorization under thermal decomposition                                                          | 1 M KOH | 223@10            | 43.0 | 15 |
| N-doped anodized stainless-steel mesh (NASSM)      | Anodic oxidation (4 °C, 10V) followed by nitrogenization (450 °C, NH <sub>3</sub> )                                                             | 1 M KOH | 225@10            | 49.7 | 16 |
| 434 SS scrubber                                    | Direct use                                                                                                                                      | 1 M KOH | 418@10            | 63   | 17 |
| Stainless-steel fiber felt (SSFF)                  | Electrochemical induction with cyclic voltammetry (CV) in KOH solution                                                                          | 1 M KOH | 230@10<br>279@100 | 44.0 | 18 |
| CNT/SS                                             | Atmospheric pressure chemical vapor deposition (APCVD) method                                                                                   |         | 297@10            | 66.7 |    |
| OxCNT/SS                                           | APCVD method followed by oxidation process in conc. H <sub>2</sub> SO <sub>4</sub> and conc. H <sub>2</sub> SO <sub>4</sub> solution containing | 1 M KOH | 267@10            | 44.0 | 19 |

|                                                            |                                                                                                                                                                                                                                |           |        |      |    |
|------------------------------------------------------------|--------------------------------------------------------------------------------------------------------------------------------------------------------------------------------------------------------------------------------|-----------|--------|------|----|
|                                                            | KMnO <sub>4</sub> and NaNO <sub>3</sub> at 40 °C                                                                                                                                                                               |           |        |      |    |
| <b>RuO<sub>2</sub>/O<sub>x</sub>CNT/SS</b>                 | APCVD method followed by oxidation process (in conc. H <sub>2</sub> SO <sub>4</sub> and conc. H <sub>2</sub> SO <sub>4</sub> solution containing KMnO <sub>4</sub> and NaNO <sub>3</sub> at 40 °C) and a hydrothermal process. |           | 217@10 | 38.8 |    |
| Modified Ni42 steel                                        | Anodization process                                                                                                                                                                                                            | 0.1 M KOH | 254@10 | 71.6 | 20 |
|                                                            |                                                                                                                                                                                                                                | 1 M KOH   | 215@10 | -    |    |
| Modified AISI 316 steel                                    | Hydrothermal combined in situ electrochemical oxidation–reduction cycle (EORC) method                                                                                                                                          | 1 M KOH   | 280@10 | 34   | 21 |
| Ni <sub>0.33</sub> Co <sub>0.67</sub> S <sub>2</sub> NN/SS | Two-step hydrothermal method                                                                                                                                                                                                   |           | 286@50 | 55   | 22 |
| FeNi LDH@NWSSF                                             | Non-woven stainless steel fabrics (NWSSF) were fabricated by wet lay-up papermaking process and followed by a heat treatment process and FeNi LDH@NWSSF was synthesized through a urea-assisted hydrothermal method on NWSSF.  | 1 M KOH   | 210@10 | 56   | 23 |
| Modified AISI 304-12 h                                     | Hydrothermal corrosion process in the presence of an equimolar mixture of KOH and NaOCl at 180 °C for 12 h.                                                                                                                    | 1 M KOH   | 260@10 | 41.0 | 24 |
| <b>Fe(Ni)OOH modified SS</b>                               | Oxidation process by immersing SS in an alkaline oxidant solution containing NaOH and (NH <sub>4</sub> ) <sub>2</sub> S <sub>2</sub> O <sub>8</sub> for 12 h                                                                   | 1 M KOH   | 300@10 | 34   | 25 |
| <b>NiS@SLS</b>                                             | Hydrothermal method                                                                                                                                                                                                            | 0.1 M KOH | 297@11 | 47.0 | 26 |
| <b>Oxidized Steel</b>                                      | Oxidation process by                                                                                                                                                                                                           | 0.1 M     | 347@2  | -    | 27 |

|                                                                         |                                                                                   |           |        |    |    |
|-------------------------------------------------------------------------|-----------------------------------------------------------------------------------|-----------|--------|----|----|
| <b>S235</b>                                                             | chlorine gas                                                                      | KOH       |        |    |    |
| <b>Ni(Fe)O<sub>x</sub>H<sub>y</sub>/SS</b>                              | Hydrothermal method at 100 °C                                                     | 1 M KOH   | 230@20 | 36 | 28 |
| <b>Ni(OH)<sub>2</sub>/316L stainless steel nanoparticles on Ni foam</b> | Electrophoretic deposition (EPD) based co-deposition method                       | 1 M KOH   | 220@10 | 42 | 29 |
| <b>Elox300-AISI 304</b>                                                 | Anodization process at a current density of 1.77 A cm <sup>-2</sup> in 7.2 M NaOH | 1 M KOH   | 212@12 | -  | 30 |
|                                                                         |                                                                                   | 0.1 M KOH | 269@10 | 49 |    |

**Table S3.** Comparison of overpotential at 10, 50 and 100 mA cm<sup>-2</sup> and R<sub>ct</sub> for bare SS, Ni@SS, 5NiP@SS, 10NiP@SS, 15NiP@SS, 20NiP@SS and Pt-C@SS in case of HER.

| Electrode       | Overpotential |             |              |
|-----------------|---------------|-------------|--------------|
|                 | $\eta_{10}$   | $\eta_{50}$ | $\eta_{100}$ |
| <b>Bare SS</b>  | <b>428</b>    | <b>544</b>  | <b>--</b>    |
| <b>Ni@SS</b>    | <b>376</b>    | <b>496</b>  | <b>--</b>    |
| <b>5NiP@SS</b>  | <b>288</b>    | <b>378</b>  | <b>--</b>    |
| <b>10NiP@SS</b> | <b>285</b>    | <b>366</b>  | <b>423</b>   |
| <b>15NiP@SS</b> | <b>268</b>    | <b>348</b>  | <b>403</b>   |
| <b>20NiP@SS</b> | <b>277.5</b>  | <b>366</b>  | <b>424</b>   |
| <b>Pt/C@SS</b>  | <b>84</b>     | <b>231</b>  | <b>374</b>   |

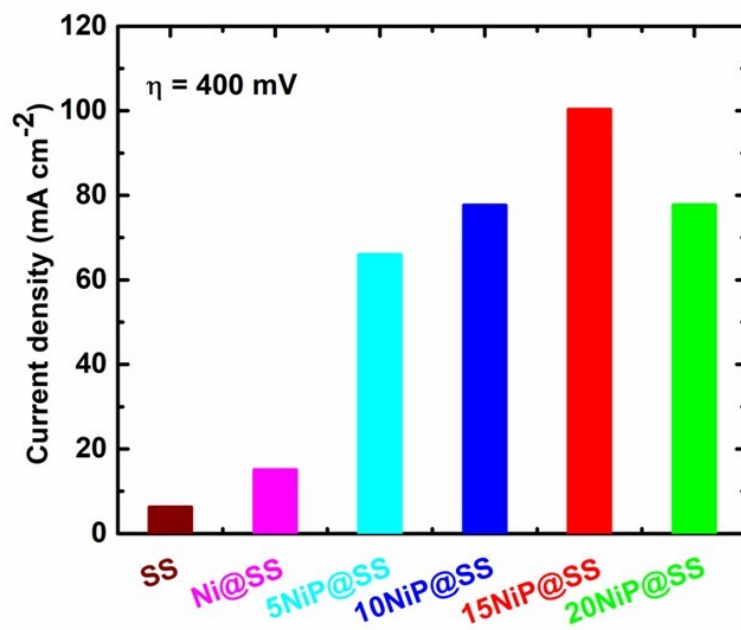

**Fig. S14.** Current densities for all prepared catalysts at an overpotential of 400 mV for HER.

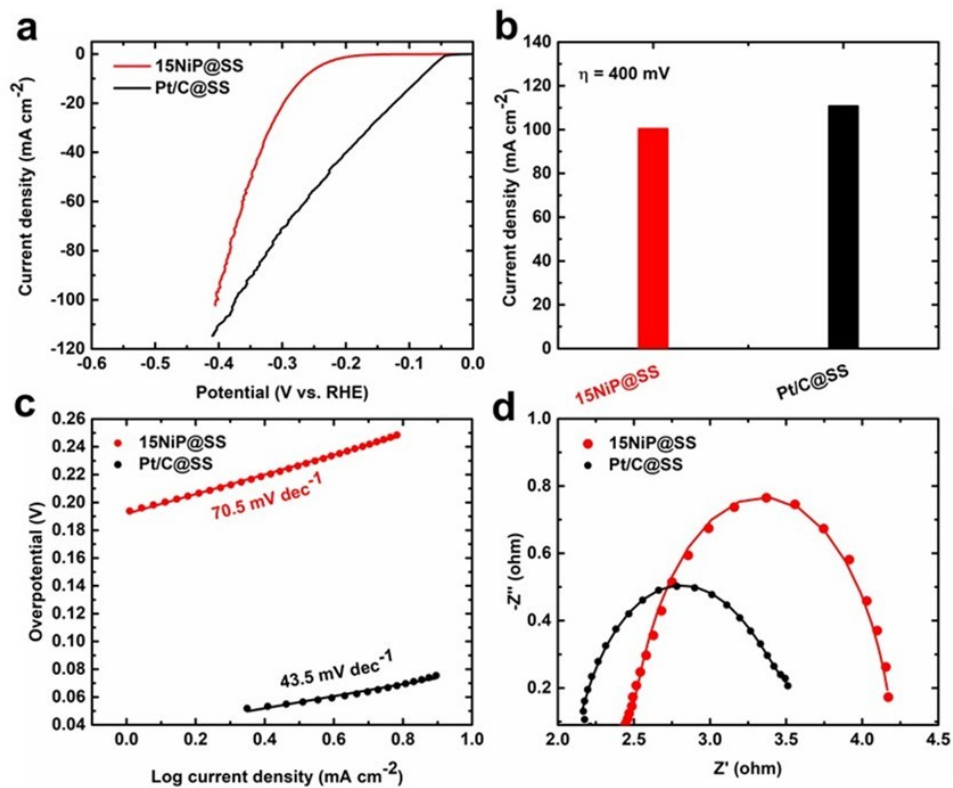

**Fig. S15.** HER electrocatalytic performance of Pt-C@SS and 15NiP@SS. a) LSV Polarization curves at 1 mV/s scan; b) Current densities at an overpotential of 400 mV; c) Tafel plots; d) Nyquist plots at -1.3 V vs. Hg/HgO.

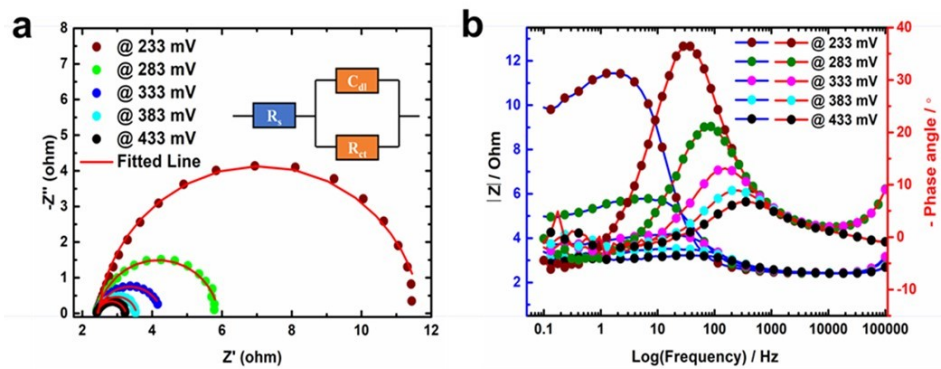

**Fig. S16.** a) Nyquist plots and b) Bode plots of 15NiP@SS electrode recorded at increasing overpotentials for HER.

**Table S4:** EIS data of HER on SS, Ni@SS and xNiP@SS electrodes .

| Catalyst | $R_s$ (Ohm) | $R_{ct}$ (Ohm) | $C_{dl}$ (F)           | ECSA (cm <sup>2</sup> ) | Roughness factor ( $\sigma$ ) |
|----------|-------------|----------------|------------------------|-------------------------|-------------------------------|
| SS       | 2.29        | 23.06          | $2.07 \times 10^{-04}$ | 10.3                    | 06.89                         |
| Ni@SS    | 2.16        | 10.32          | $2.27 \times 10^{-04}$ | 11.4                    | 07.58                         |
| 5NiP@SS  | 2.63        | 03.05          | $5.84 \times 10^{-04}$ | 29.2                    | 19.50                         |
| 10NiP@SS | 2.17        | 02.36          | $5.93 \times 10^{-04}$ | 29.7                    | 19.80                         |
| 15NiP@SS | 2.44        | 01.84          | $7.27 \times 10^{-04}$ | 36.4                    | 24.20                         |
| 20NiP@SS | 2.19        | 02.39          | $5.99 \times 10^{-04}$ | 30.0                    | 20.00                         |

**Table S5:** EIS data of HER on 15NiP@SS electrode at different potentials.

| @ Overpotential<br>(vs. HER) | $R_s$ ( $\Omega$ ) | $R_{ct}$ ( $\Omega$ ) | $C_{dl}$ (F)            | ECSA (cm <sup>2</sup> ) | Roughness factor ( $\sigma$ ) |
|------------------------------|--------------------|-----------------------|-------------------------|-------------------------|-------------------------------|
| 233 mV                       | 2.45               | 9.26                  | $11.00 \times 10^{-04}$ | 55.1                    | 36.7                          |
| 283 mV                       | 2.44               | 3.46                  | $08.61 \times 10^{-04}$ | 43.0                    | 28.7                          |
| 333 mV                       | 2.44               | 1.84                  | $07.27 \times 10^{-04}$ | 36.4                    | 24.2                          |
| 383 mV                       | 2.43               | 1.12                  | $05.97 \times 10^{-04}$ | 29.9                    | 19.9                          |
| 433 mV                       | 2.42               | 0.82                  | $05.48 \times 10^{-04}$ | 27.4                    | 18.3                          |

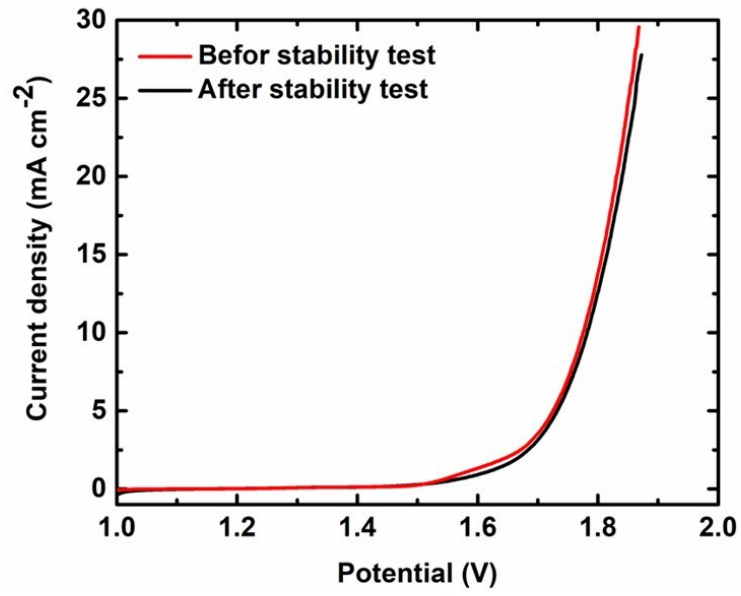

**Fig. 17.** Polarization curves of 15NiP@SS // 10NiP@SS couple before and after stability tests.



**Table S6.** Comparison of the 15NiP@SS catalyst with recently published Ni phosphide- and SS-based catalysts for the HER in alkaline electrolytes.

| Catalysts                                                  | Method of modification                                                                                   | Electrolyte | Overpotential (mv) at specific current density | Tafel plot (mV dec <sup>-1</sup> ) | Ref.      |
|------------------------------------------------------------|----------------------------------------------------------------------------------------------------------|-------------|------------------------------------------------|------------------------------------|-----------|
| 15NiP@SS                                                   | Electrodeposition at room temperature                                                                    | 1 M KOH     | 268 @10                                        | 70.5                               | This work |
| Ni@SS                                                      | Electrodeposition at room temperature                                                                    | 1 M KOH     | 376@10                                         | 109.63                             |           |
| Bare SS                                                    | -                                                                                                        | 1 M KOH     | 428@10                                         | 117.93                             |           |
| Ni <sub>2</sub> P/CNS                                      | Pyrolysis process followed by hydrothermal process                                                       | 0.1 M KOH   | 315@10                                         | 120                                | 31        |
| Ni <sub>2</sub> P/Ni <sub>12</sub> P <sub>5</sub>          | Hydrothermal method at 140 °C                                                                            | 1 M KOH     | 234@10                                         | 98                                 | 32        |
| Ni <sub>12</sub> P <sub>5</sub>                            |                                                                                                          |             | 248@10                                         | 100                                |           |
| Ni <sub>2</sub> P                                          |                                                                                                          |             | 258@10                                         | 169                                |           |
| Ni <sub>3</sub> P                                          | Pyrolysis process at 700 °C for 24 h                                                                     | 1 M NaOH    | 291@10                                         | 119                                | 33        |
| Ni <sub>2</sub> P nanoparticles                            | Thermal reaction of NaH <sub>2</sub> PO <sub>2</sub> and NiCl <sub>2</sub> ·6H <sub>2</sub> O at 250 °C  | 1 M KOH     | 250@10                                         | 100                                | 34        |
| Ni <sub>2</sub> P film                                     | Deposition of nickel layer using a Semicore electron-beam evaporator followed by phosphorization process | 1 M KOH     | 200@10                                         | -                                  | 35        |
| NiFeP                                                      |                                                                                                          |             | 255@10                                         |                                    |           |
| FeP                                                        |                                                                                                          |             | 300@10                                         |                                    |           |
| NiFe LDH-NS@defective graphene                             | Exfoliation followed by electrostatic flocculation                                                       | 1 M KOH     | 300@10                                         | -                                  | 36        |
| EG/Co <sub>0.85</sub> Se/NiFe-LDH                          | Two hydrothermal process                                                                                 | 1 M KOH     | ~265@10                                        | 160                                | 37        |
| CoNi <sub>2</sub> S <sub>4</sub>                           | Hydrothermal method                                                                                      | 1 M KOH     | 280@10                                         | 85                                 | 38        |
| Modified Ni42 steel                                        | Anodization process                                                                                      | 1 M KOH     | 299@10                                         | 117.5                              | 20        |
| SS scrubber                                                | Direct use                                                                                               | 1 M KOH     | 373@10                                         | 121                                | 17        |
| Ni <sub>0.33</sub> Co <sub>0.67</sub> S <sub>2</sub> NN/SS | Two-step hydrothermal method                                                                             | 1 M KOH     | 350@30                                         | 76                                 | 22        |
| N, P doped SS316L                                          | Exfoliation method followed by annealing                                                                 | 1 M KOH     | 230@10                                         |                                    | 12        |

| process at 400 °C                                  |                                                                                                                                                                                                  |         |         |       |    |
|----------------------------------------------------|--------------------------------------------------------------------------------------------------------------------------------------------------------------------------------------------------|---------|---------|-------|----|
| Etched SS304 (ESS)                                 | Immersing process in 1 M HCl solution at 60 °C for 1.5 h.                                                                                                                                        | 1 M KOH | 466 @10 | -     | 39 |
| Pristine anodized SS304 (EASS)                     | Etching process in HCl followed by anodization process                                                                                                                                           |         | 370 @10 | -     |    |
| Activated anodized SS304 (EASS-Ar/H <sub>2</sub> ) | Etching process in HCl followed by anodization process and thermal annealing process in Ar/H <sub>2</sub> at 650 °C for 1 h                                                                      |         | 244 @10 | -     |    |
| CNT/SS                                             | Atmospheric pressure chemical vapor deposition (APCVD) method                                                                                                                                    | 1 M KOH | 334@10  | 119.6 | 19 |
| OxCNT/SS                                           | APCVD method followed by oxidation process in conc. H <sub>2</sub> SO <sub>4</sub> and conc. H <sub>2</sub> SO <sub>4</sub> solution containing KMnO <sub>4</sub> and NaNO <sub>3</sub> at 40 °C |         | 257@10  | 105.6 |    |

**Table S7.** Comparison of the overall water splitting performance for the 10NiP@SS (+) || 15NiP@SS (-) catalyst with recently published Ni phosphide- and SS-based catalysts in alkaline electrolytes.

| Catalysts                                                                                                          | Method of modification                                                                                                                          | Electrolyte    | Overpotential (mv) at 10 mA cm <sup>-2</sup> | Ref.             |
|--------------------------------------------------------------------------------------------------------------------|-------------------------------------------------------------------------------------------------------------------------------------------------|----------------|----------------------------------------------|------------------|
| <b>10NiP@SS (+)    15NiP@SS (-)</b>                                                                                | <b>Electrodeposition at room temperature</b>                                                                                                    | <b>1 M KOH</b> | <b>1.77</b>                                  | <b>This work</b> |
| NiS/Ni <sub>2</sub> P (+)    NiS/Ni <sub>2</sub> P (-)                                                             | Hydrothermal followed by sulfurization and phosphorization                                                                                      | 1 M KOH        | 1.67                                         | 40               |
| C@Ni <sub>8</sub> P <sub>3</sub> (+)    C@Ni <sub>8</sub> P <sub>3</sub> (-)                                       | solvothermal procedure                                                                                                                          | 1 M KOH        | 1.65                                         | 41               |
| Ni <sub>8</sub> P <sub>3</sub> (+)    Ni <sub>8</sub> P <sub>3</sub> (-)                                           |                                                                                                                                                 |                | 1.79                                         |                  |
| Ni <sub>5</sub> P <sub>4</sub> @ Ni foil (+)    Ni <sub>5</sub> P <sub>4</sub> @ Ni foil (-)                       | Heating of nickel foil and red phosphorus for 1 h at 550 °C under an inert atmosphere                                                           | 1 M KOH        | 1.7@10                                       | 42               |
| Ni <sub>2</sub> P/Ni(PO <sub>3</sub> ) <sub>2</sub> (+)    Ni <sub>2</sub> P/Ni(PO <sub>3</sub> ) <sub>2</sub> (-) | Hydrolysis process followed by pyrolysis and phosphorization                                                                                    | 1 M KOH        | 1.63                                         | 43               |
| Ni-P/CF (+)    Ni-P/CF (-)                                                                                         | Electrodeposition                                                                                                                               | 1 M KOH        | 1.68                                         | 44               |
| Ni <sub>2</sub> P/NF (+)    Ni <sub>2</sub> P/NF (-)                                                               | Thermal reaction of NaH <sub>2</sub> PO <sub>2</sub> and NiCl <sub>2</sub> ·6H <sub>2</sub> O at 250 °C                                         | 1 M KOH        | 1.63                                         | 45               |
| NESS (+)    NESSP (-)                                                                                              | Exfoliation method followed by annealing process at 400 °C                                                                                      | 1 M KOH        | 1.74                                         | 12               |
| SS scrubber (+, -)                                                                                                 | Direct use                                                                                                                                      | 1 M KOH        | 1.98                                         | 17               |
| CNT/SS (+, -)                                                                                                      | Atmospheric pressure chemical vapor deposition (APCVD) method                                                                                   | 1 M KOH        | 1.95                                         | 19               |
| OxCNT/SS (+, -)                                                                                                    | APCVD method followed by oxidation process in conc. H <sub>2</sub> SO <sub>4</sub> and conc. H <sub>2</sub> SO <sub>4</sub> solution containing |                | 1.83                                         |                  |
| NASSM (+, -)                                                                                                       | Anodic oxidation (4 °C, 10V) followed by nitrogenization (450 °C, NH <sub>3</sub> )                                                             | 1 M KOH        | 1.61                                         | 16               |
| Ni <sub>0.33</sub> Co <sub>0.67</sub> S <sub>2</sub> NN/SS                                                         | Two-step hydrothermal method                                                                                                                    | 1 M KOH        | 1.67                                         | 22               |
| FeNi LDH@NWSSF                                                                                                     | Non-woven stainless steel fabrics (NWSSF) were fabricated by wet lay-up papermaking process and                                                 | 1 M KOH        | 1.56                                         | 23               |

|                                                                                                                               |  |  |  |
|-------------------------------------------------------------------------------------------------------------------------------|--|--|--|
| followed by a heat treatment process and FeNi LDH@NWSSF was synthesized through a urea-assisted hydrothermal method on NWSSF. |  |  |  |
|-------------------------------------------------------------------------------------------------------------------------------|--|--|--|

**Video S2:** Hydrogen and oxygen production during the full water splitting test at  $10 \text{ mA cm}^{-2}$ .

**Video S3:** Hydrogen and oxygen production during the full water splitting test at  $20 \text{ mA cm}^{-2}$ .

**Video S4:** Hydrogen and oxygen production during the full water splitting test at  $50 \text{ mA cm}^{-2}$ .

## References

1. P. Bhanja, Y. Kim, B. Paul, Y. V. Kaneti, A. A. Alothman, A. Bhaumik and Y. Yamauchi, *Chem. Eng. J.*, 2021, **405**, 126803.
2. E. Hu, Y. Feng, J. Nai, D. Zhao, Y. Hu and X. W. Lou, *Energy Environ. Sci.*, 2018, **11**, 872-880.
3. Y. Li, X. Jiang, Z. Miao, J. Tang, Q. Zheng, F. Xie and D. Lin, *ChemCatChem*, 2020, **12**, 917-925.
4. S. M. Pawar, A. T. Aqueel Ahmed, C. H. Lee, P. T. Babar, J. H. Kim, S. U. Lee, H. Kim and H. Im, *ACS Appl. Energy Mater.*, 2021, **4**, 14169-14179.
5. M. Guo, Y. Li, L. Zhou, Q. Zheng, W. Jie, F. Xie, C. Xu and D. Lin, *Electrochim. Acta*, 2019, **298**, 525-532.
6. X. Luo, P. Ji, P. Wang, R. Cheng, D. Chen, C. Lin, J. Zhang, J. He, Z. Shi, N. Li, S. Xiao and S. Mu, *Adv. Energy Mater.*, 2020, **10**, 1903891.

7. J. Lin, Y. Yan, C. Li, X. Si, H. Wang, J. Qi, J. Cao, Z. Zhong, W. Fei and J. Feng, *Nano-Micro Lett.*, 2019, **11**, 55.
8. D. Song, D. Hong, Y. Kwon, H. Kim, J. Shin, H. M. Lee and E. Cho, *J. Mater. Chem. A*, 2020, **8**, 12069-12079.
9. Y. Lyu, R. Wang, L. Tao, Y. Zou, H. Zhou, T. Liu, Y. Zhou, J. Huo, S. P. Jiang, J. Zheng and S. Wang, *Appl. Catal. B: Environ.*, 2019, **248**, 277-285.
10. X. Liu, B. You and Y. Sun, *ACS Sustainable Chem. Eng*, 2017, **5**, 4778-4784.
11. F. Moureaux, P. Stevens, G. Toussaint and M. Chatenet, *Appl. Catal. B: Environ.*, 2019, **258**, 117963.
12. M.-S. Balogun, W. Qiu, Y. Huang, H. Yang, R. Xu, W. Zhao, G.-R. Li, H. Ji and Y. Tong, *Adv. Mater.*, 2017, **29**, 1702095.
13. M. Lee, M. S. Jee, S. Y. Lee, M. K. Cho, J.-P. Ahn, H.-S. Oh, W. Kim, Y. J. Hwang and B. K. Min, *ACS Appl. Mater. Inter*, 2018, **10**, 24499-24507.
14. Y. Xiao, T. Hu, X. Zhao, F. X. Hu, H. B. Yang and C. M. Li, *Nano Energy*, 2020, **75**, 104949.
15. Y. Gao, T. Xiong, Y. Li, Y. Huang, Y. Li and M. S. J. T. Balogun, *ACS Omega*, 2019, **4**, 16130-16138.
16. M. Yao, B. Sun, N. Wang, W. Hu and S. Komarneni, *Appl. Surf. Sci.*, 2019, **480**, 655-664.
17. S. Anantharaj, S. Chatterjee, K. C. Swaathini, T. S. Amarnath, E. Subhashini, D. K. Pattanayak and S. Kundu, *ACS Sustainable Chem. Eng*, 2018, **6**, 2498-2509.
18. S. Zhu, C. Chang, Y. Sun, G. Duan, Y. Chen, J. Pan, Y. Tang and P. Wan, *Int. J. Hydrog. Energy*, 2020, **45**, 1810-1821.

19. H. Zhang, J. M. de Souza e Silva, X. Lu, C. S. de Oliveira, B. Cui, X. Li, C. Lin, S. L. Schweizer, A. W. Maijenburg, M. Bron and R. B. Wehrspohn, *Adv. Mater. Inter.*, 2019, **6**, 1900774.
20. H. Schäfer, D. M. Chevrier, P. Zhang, J. Stangl, K. Müller-Buschbaum, J. D. Hardege, K. Kuepper, J. Wollschläger, U. Krupp, S. Dühnen, M. Steinhart, L. Walder, S. Sadaf and M. Schmidt, *Adv. Funct. Mater.*, 2016, **26**, 6402-6417.
21. H. Zhong, J. Wang, F. Meng and X. Zhang, *Angew. Chem.*, 2016, **128**, 10091-10095.
22. G. He, W. Zhang, Y. Deng, C. Zhong, W. Hu and X. Han, *Catalysts*, 2017, **7**, 366.
23. L. Wang, X. Huang, S. Jiang, M. Li, K. Zhang, Y. Yan, H. Zhang and J. M. Xue, *ACS Appl. Mater. Inter.*, 2017, **9**, 40281-40289.
24. S. Anantharaj, M. Venkatesh, A. S. Salunke, T. V. S. V. Simha, V. Prabu and S. Kundu, *ACS Sustainable Chem. Eng.*, 2017, **5**, 10072-10083.
25. D. Tang, O. Mabayoje, Y. Lai, Y. Liu and C. B. Mullins, *ChemistrySelect*, 2017, **2**, 2230-2234.
26. J. S. Chen, J. Ren, M. Shalom, T. Fellingner and M. Antonietti, *ACS Appl. Mater. Inter.*, 2016, **8**, 5509-5516.
27. H. Schäfer, K. Küpper, J. Wollschläger, N. Kashaev, J. Hardege, L. Walder, S. Mohsen Beladi-Mousavi, B. Hartmann-Azanza, M. Steinhart and S. Sadaf, *ChemSusChem*, 2015, **8**, 3099-3110.
28. Q. Zhang, H. Zhong, F. Meng, D. Bao, X. Zhang and X. Wei, *Nano Research*, 2018, **11**, 1294-1300.
29. A. Balram, H. Zhang and S. Santhanagopalan, *Mater. Chem. Front.*, 2017, **1**, 2376-2382.

30. H. Schäfer, S. Sadaf, L. Walder, K. Kuepper, S. Dinklage, J. Wollschläger, L. Schneider, M. Steinhart, J. Hardege and D. Daum, *Energy Environ. Sci.*, 2015, **8**, 2685-2697.
31. Y. Li, P. Cai, S. Ci and Z. Wen, *ChemElectroChem*, 2017, **4**, 340-344.
32. S. Surendran, S. Shanmugapriya, S. Shanmugam, L. Vasylechko and R. Kalai Selvan, *ACS Appl. Energy Mater.*, 2018, **1**, 78-92.
33. A. B. Laursen, R. B. Wexler, M. J. Whitaker, E. J. Izett, K. U. D. Calvino, S. Hwang, R. Rucker, H. Wang, J. Li, E. Garfunkel, M. Greenblatt, A. M. Rappe and G. C. Dismukes, *ACS Catal.*, 2018, **8**, 4408-4419.
34. L. Feng, H. Vrubel, M. Bensimon and X. Hu, *Phys. Chem. Chem. Phys.*, 2014, **16**, 5917-5921.
35. C. G. Read, J. F. Callejas, C. F. Holder and R. E. Schaak, *ACS Appl. Mater. Inter.*, 2016, **8**, 12798-12803.
36. Y. Jia, L. Zhang, G. Gao, H. Chen, B. Wang, J. Zhou, M. T. Soo, M. Hong, X. Yan, G. Qian, J. Zou, A. Du and X. Yao, *Adv. Mater.*, 2017, **29**, 1700017.
37. Y. Hou, M. R. Lohe, J. Zhang, S. Liu, X. Zhuang and X. Feng, *Energy Environ. Sci.*, 2016, **9**, 478-483.
38. D. Wang, X. Zhang, Z. Du, Z. Mo, Y. Wu, Q. Yang, Y. Zhang and Z. Wu, *Int. J. Hydrog. Energy*, 2017, **42**, 3043-3050.
39. M. Kim, J. Ha, N. Shin, Y.-T. Kim and J. Choi, *Electrochim. Acta*, 2020, **364**, 137315.
40. X. Xiao, D. Huang, Y. Fu, M. Wen, X. Jiang, X. Lv, M. Li, L. Gao, S. Liu, M. Wang, C. Zhao and Y. Shen, *ACS Appl. Mater. Inter.*, 2018, **10**, 4689-4696.
41. J. Yu, Q. Li, N. Chen, C.-Y. Xu, L. Zhen, J. Wu and V. P. Dravid, *ACS Appl. Mater. Inter.*, 2016, **8**, 27850-27858.

42. M. Ledendecker, S. Krick Calderón, C. Papp, H.-P. Steinrück, M. Antonietti and M. Shalom, *Angew. Chem., Int. Ed.*, 2015, **54**, 12361-12365.
43. J. Tong, W. Li, L. Bo, Y. Li, T. Li and Q. Zhang, *Electrochim. Acta*, 2019, **320**, 134579.
44. Q. Liu, S. Gu and C. M. Li, *J. Power Sources*, 2015, **299**, 342-346.
45. L.-A. Stern, L. Feng, F. Song and X. Hu, *Energy Environ. Sci.*, 2015, **8**, 2347-2351.
